# Supplementary material for: A reticuloendothelial system-stealthy dye–albumin nanocomplex as a highly biocompatible and highly luminescent nanoprobe for targeted in vivo tumor imaging
Source: Royal Society of Chemistry journal article supplement (doi:10.1039/c3ra47058j), 2013-12-19
Supplement: c3ra47058j.pdf [file c3ra47058j.pdf]

## Supporting Information

A Reticuloendothelial System-Stealthy Dye-Albumin  
Nanocomplex as a Highly Biocompatible and Highly  
Luminescent Nanoprobe for Targeted In Vivo Tumor  
Imaging

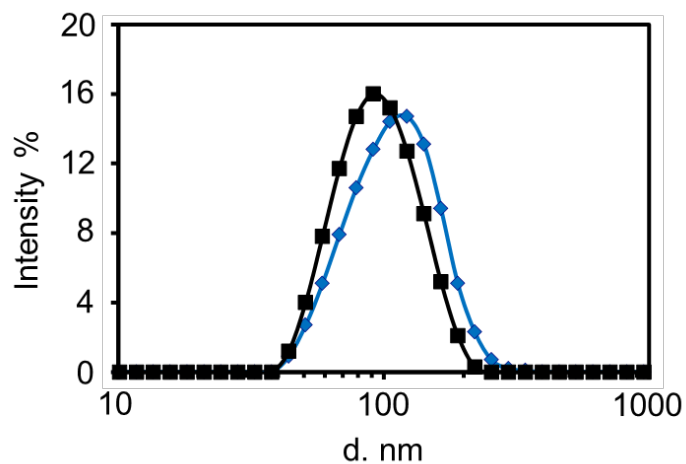

**Figure S1.** Hydrodynamic diameter distribution of nanocomplex in deionized water by intensity at day 0 (black) and day 46 (blue).

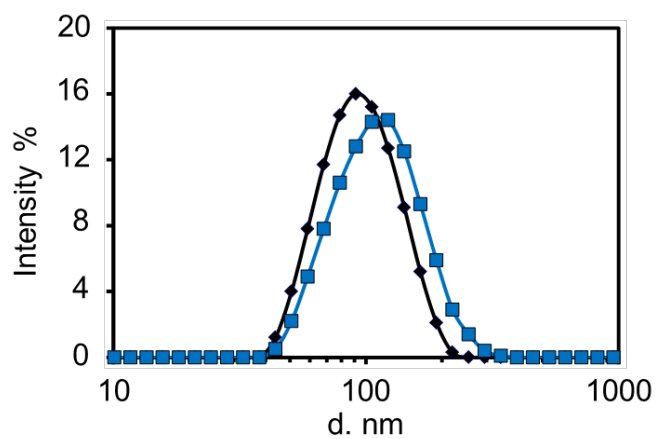

**Figure S2.** Hydrodynamic diameter distribution of nanocomplex in saline by intensity at day 0 (black) and day 2 (blue).

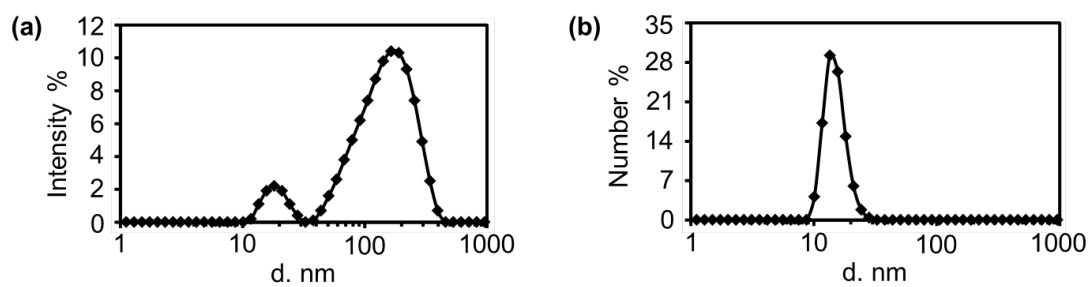

**Figure S3.** Hydrodynamic diameter distribution of Spiro-BTA loaded DSPE-PEG nanomicelle in saline by intensity (a) and number (b).
